# Supplementary material
Source: MDPI journal article supplement (https://www.mdpi.com/2073-4344/8/8/308)
Supplement: s1 [file s1]

## Supplementary Materials:

# Biocatalytic approach to chiral $\beta$ -nitroalcohols by enantioselective alcohol dehydrogenase – mediated reduction of $\alpha$ -nitroketones

Francesca Tentori<sup>1</sup>, Elisabetta Brenna,<sup>1,2,\*</sup> Danilo Colombo,<sup>1</sup> Michele Crotti,<sup>1</sup> Francesco G. Gatti,<sup>1</sup> Maria Chiara Ghezzi,<sup>1</sup> and Giuseppe Pedrocchi – Fantoni<sup>2</sup>

<sup>1</sup> Politecnico di Milano, Dipartimento di Chimica, Materiali, Ingegneria Chimica, Via Mancinelli 7, I-20131 Milano (Italy).

<sup>2</sup> Istituto di Chimica del Riconoscimento Molecolare – CNR, Via Mancinelli 7, I-20131 Milano (Italy).

\* Correspondence: [mariaelisabetta.brenna@polimi.it](mailto:mariaelisabetta.brenna@polimi.it) ; Tel.: +39-02-23993077

---

### Table of contents

|                                                                                                 |          |
|-------------------------------------------------------------------------------------------------|----------|
| General analytical methods .....                                                                | pag. S2  |
| Overexpression of GDH in E. coli BL21(DE3) .....                                                | pag. S2  |
| General procedure for the synthesis of nitroketones <b>3</b> .....                              | pag. S3  |
| Characterization data of substrates <b>3l-o</b> .....                                           | pag. S4  |
| General procedure for the synthesis of racemic nitroalcohols <b>1</b> .....                     | pag. S5  |
| Characterization data of substrates <b>1a-o</b> .....                                           | pag. S5  |
| Table S1. ADH-mediated reduction of nitroketone <b>3a</b> to nitroalcohol <b>1a</b> .....       | pag. S13 |
| (preliminary screening)                                                                         |          |
| Table S2. ADH-mediated reduction of nitroketones <b>3a-o</b> to nitroalcohols <b>1a-o</b> ..... | pag. S14 |
| (preliminary screening)                                                                         |          |
| References.....                                                                                 | pag. S15 |

## General analytical methods

$^1\text{H}$  and  $^{13}\text{C}$  NMR spectra were recorded on a 400 or 500 MHz spectrometer in  $\text{CDCl}_3$  solution at r.t..

The chemical shift scale was based on internal tetramethylsilane.

GC-MS analyses were performed using a HP-5MS column ( $30\text{ m} \times 0.25\text{ mm} \times 0.25\text{ }\mu\text{m}$ , Agilent).

The following temperature program was employed:  $60^\circ\text{C}$  (1 min) /  $6^\circ\text{C min}^{-1}$  /  $150^\circ\text{C}$  (1 min) /  $12^\circ\text{C min}^{-1}$  /  $280^\circ\text{C}$  (5 min). Chiral HPLC analyses were performed on a Chiralcel OD column ( $4.6\text{ mm} \times 250\text{ mm}$ , Daicel) or on Chiralart Amylose SA ( $4.6\text{ mm} \times 250\text{ mm}$ , YMC) installed on instruments with UV detector.

TLC analyses were performed on Merck Kieselgel 60 F254 plates. All the chromatographic separations were carried out on silica gel columns.

## Overexpression of GDH in *E. coli* BL21(DE3)

Glucose dehydrogenase (GDH from *Bacillus megaterium*) was overexpressed in *E. coli* BL21(DE3) strains harboring the plasmid pKTS-GDH [1]. LB medium (5 mL) containing the appropriate antibiotic ( $100\text{ }\mu\text{g mL}^{-1}$  ampicillin) was inoculated with a single colony from a fresh plate and grown for 8 h at  $37^\circ\text{C}$  and 220 rpm. This starter culture was used to inoculate 200 mL medium, which was incubated for 8 h at the same conditions and used to inoculate 1.5 L medium. The latter culture was shaken at  $37^\circ\text{C}$  and 220 rpm until  $\text{OD}_{600}$  reached 0.4-0.5, then enzyme expression was induced by the addition of 0.1 mM IPTG and  $50\text{ ng mL}^{-1}$  anhydrotetracycline. After 5-6 h the cells were harvested by centrifugation ( $5000\text{ g}$ , 20 min,  $4^\circ\text{C}$ ), resuspended in 50 mL of lysis buffer (20 mM potassium phosphate buffer pH 7.0, 300 mM NaCl, 10 mM imidazole) and disrupted by sonication (Omni Ruptor 250 ultrasonic homogeniser, five sonication cycles, 15 s each, 50% duty). The cell-free extract, after centrifugation ( $20000\text{ g}$ , 20 min,  $4^\circ\text{C}$ ), was chromatographed on IMAC stationary phase (Ni-Sepharose Fast Flow, GE Healthcare) with a mobile phase composed of 20 mM potassium phosphate buffer pH 7.0, 300 mM NaCl and a 10-300 mM imidazole gradient. Protein elution was monitored at 280 nm, the fractions were collected according to the

chromatogram and dialysed twice against 1.0 L of 50 mM potassium phosphate buffer pH 7.0 (12 h each, 4°C) to remove imidazole and salts. Purified protein aliquots were stored frozen at –80°C.

### General procedure for the synthesis of nitroketones **3a-o** [2]

A solution of the suitable carboxylic acid (0.083 mol) and CDI (*N,N'*-carbonyldiimidazole, 0.10 mol) in dry THF (150 mL) was refluxed for 1 h (solution A). During that time, CH<sub>3</sub>NO<sub>2</sub> (2.32 mol) was slowly added at room temperature to a suspension of NaH (0.10 mmol) in dry THF (100 mL). The resulting solution was stirred for further 30 minutes at room temperature (solution B). Solution A was cooled to room temperature, then transferred to the flask containing solution B. The resulting mixture was refluxed for a few hours with vigorous stirring, affording a light-yellow heterogeneous solution, which was cooled to room temperature. Approximately 2/3 of the solvent was removed *in vacuo*, then the mixture was poured into water and extracted with EtOAc. The aqueous phase was acidified with conc. HCl, to promote the formation of a solid, which was extracted with EtOAc. The combined organic phases of this second extraction were washed with brine, dried on Na<sub>2</sub>SO<sub>4</sub> and concentrated *in vacuo* to afford the corresponding crude  $\alpha$ -nitroketone, which was purified by crystallization and used for the biocatalysed reductions. The two aliphatic derivatives **3n** and **3o** were purified by column chromatography.

The characterization data of nitroketones **3a-k** have been already reported by the authors in a previous paper [3]. The synthetic details and characterization data of nitroketones **3l-o** are herein reported.

### 1-(Furan-2-yl)-2-nitroethan-1-one (**3l**)

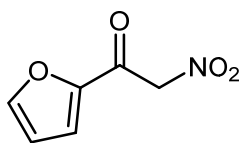

From 2-furoic acid (9.3 g, 0.083 mol) derivative **3l** was obtained (8.7 g, 68 %):  $^1\text{H}$  NMR ( $\text{CDCl}_3$ , 400 MHz) [4]:  $\delta$  = 7.68 (dd, 1H,  $J$  = 1.7 and 0.75 Hz, ArH), 7.42 (dd, 1H,  $J$  = 3.7 and 0.75 Hz, ArH), 6.67 (dd, 1H,  $J$  = 3.7 and 1.7 Hz, ArH), 5.70 (s, 2H,  $\text{CH}_2$ );  $^{13}\text{C}$  NMR ( $\text{CDCl}_3$ , 100.6 MHz) [4]:  $\delta$  = 174.5, 150.0, 148.2, 120.0, 113.7, 80.3; GC-MS (EI)  $t_r$  = 14.4 min:  $m/z$  (%) = 155 ( $\text{M}^+$ , 5), 83 (100).

### 2-Nitro-1-(thiophen-2-yl)-ethan-1-one (**3m**)

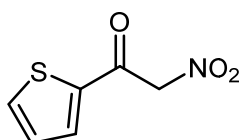

From 2-thiophenecarboxylic acid (10.2 g, 0.080 mol) derivative **3m** was obtained (10.0 g, 73 %):  $^1\text{H}$  NMR ( $\text{CDCl}_3$ , 400 MHz) [5]:  $\delta$  = 7.84 (dd, 1H,  $J$  = 5.0 and 1.1 Hz, ArH), 7.73 (dd, 1H,  $J$  = 3.9 and 1.1 Hz, ArH), 7.22 (dd, 1H,  $J$  = 5.0 and 3.9 Hz, ArH), 5.76 (s, 2H,  $\text{CH}_2$ );  $^{13}\text{C}$  NMR ( $\text{CDCl}_3$ , 100.6 MHz) [5]:  $\delta$  = 178.4, 139.9, 136.8, 133.8, 129.3, 80.9; GC-MS (EI)  $t_r$  = 18.2 min:  $m/z$  (%) = 171 ( $\text{M}^+$ , 14), 111 (100), 99 (53).

### 1-Nitrobutan-2-one (**3n**)

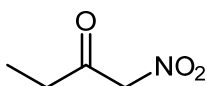

From propionic acid (6.7 g, 0.090 mmol) derivative **3n** was obtained (7.0 g, 66 %):  $^1\text{H}$  NMR ( $\text{CDCl}_3$ , 400 MHz) [6]:  $\delta$  = 5.27 (s, 2H,  $\text{CH}_2\text{-NO}_2$ ), 2.59 (q, 2H,  $J$  = 7.1 Hz,  $\text{CH}_2\text{-CH}_3$ ), 1.17 (t, 3H,  $J$  = 7.2 Hz,  $\text{CH}_3$ );  $^{13}\text{C}$  NMR ( $\text{CDCl}_3$ , 100.6 MHz) [6]:  $\delta$  = 196.6, 83.1, 34.0, 7.3; GC-MS (EI)  $t_r$  = 5.9 min:  $m/z$  (%) = 117 ( $\text{M}^+$ , 3), 88 (10), 57 (100).

### 1-Nitrohexane-2-one (3o)

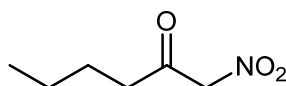

From valeric acid (9.7 g, 0.095 mmol) derivative **3o** was obtained (8.9 g, 65 %):  $^1\text{H}$  NMR ( $\text{CDCl}_3$ , 400 MHz):  $\delta$  = 5.26 (s, 2H,  $\text{CH}_2\text{-NO}_2$ ), 2.55 (t, 2H,  $J$  = 7.2 Hz,  $\text{CH}_2\text{-CO}$ ), 1.64 (quintuplet,  $J$  = 7.2 Hz, 2H,  $\text{CH}_2\text{-CH}_2\text{-CO}$ ), 1.36 (sextet,  $J$  = 7.6 Hz, 2H,  $\text{CH}_2\text{-CH}_2\text{CH}_2\text{-CO}$ ), 0.92 (t, 3H,  $J$  = 7.6 Hz,  $\text{CH}_3$ );  $^{13}\text{C}$  NMR ( $\text{CDCl}_3$ , 100.6 MHz):  $\delta$  = 196.3, 83.3, 40.3, 25.3, 22.2, 13.8; GC-MS (EI)  $t_r$  = 10.2 min:  $m/z$  (%) = 98 ( $\text{M}^+$  - 47, 10), 85 (65), 57 (100).

### General procedure for the synthesis of racemic $\beta$ -nitroalcohols 1a-o

To a stirred solution of aldehyde (1.50 mmol) in nitromethane (10 ml) triethylamine (1 ml) was added and the resulting solution was stirred at room temperature and monitored by TLC analysis. The solution was diluted with ethyl acetate (200 ml) and washed with water. The organic layers were dried over anhydrous  $\text{Na}_2\text{SO}_4$  and concentrated *in vacuo*. The crude products were purified by silica gel column chromatography eluting with hexane and increasing amount of ethyl acetate.

## 2-Nitro-1-phenylethan-1-ol (**1a**)

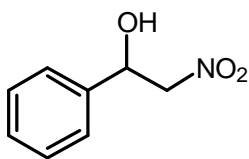

From benzaldehyde (0.16 g, 1.5 mmol) derivative **1a** was obtained (0.15 g, 60%).  $^1\text{H}$  NMR ( $\text{CDCl}_3$ , 400 MHz) [7]:  $\delta$  = 7.43-7.34 (m, 5H, ArH), 5.46 (dt, 1H,  $J$  = 9.5 and 3.4 Hz,  $\text{CH-OH}$ ), 4.62 (dd, 1H,  $J$  = 13.4 and 9.5 Hz,  $\text{CHH-NO}_2$ ), 4.52 (dd, 1H,  $J$  = 13.4 and 3.3 Hz,  $\text{CHH-NO}_2$ ), 2.81 (d, 1H,  $J$  = 3.4 Hz,  $\text{OH}$ );  $^{13}\text{C}$  NMR ( $\text{CDCl}_3$ , 100.6 MHz) [7]:  $\delta$  = 138.3, 129.1, 129.0, 126.0, 81.3, 71.1.

HPLC [7]: Chiralcel OD, 95/5 hexane/*i*-PrOH, 0.6 mL/min, 215 nm, (*R*)-**1a**  $t_r$  = 43.2 min, (*S*)-**1a**  $t_r$  = 52.4 min.

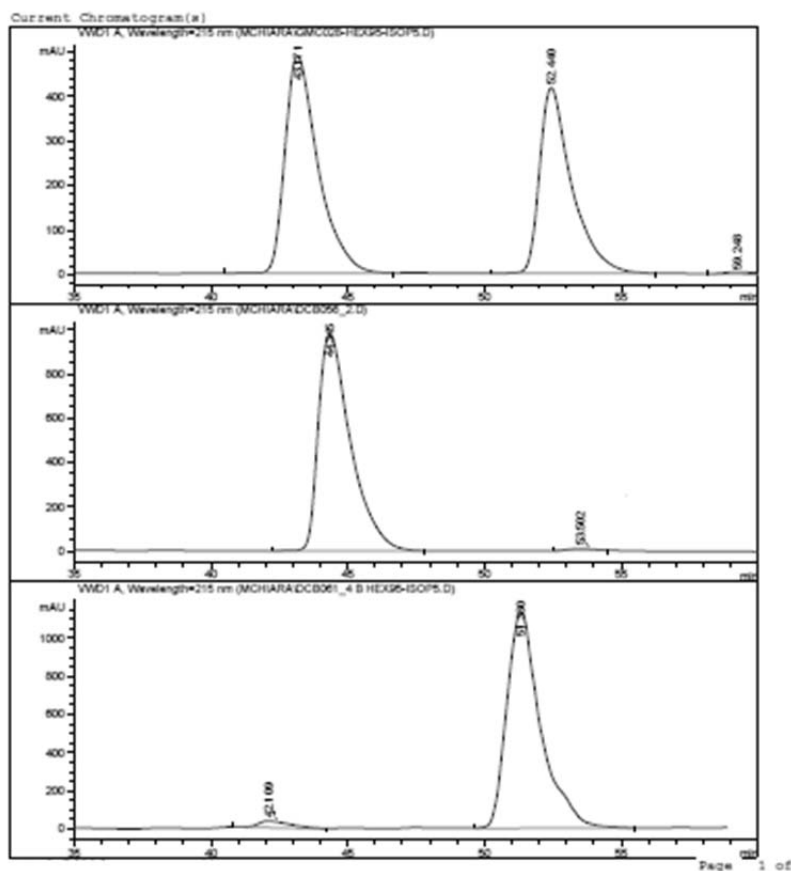

## 2-Nitro-1-(*o*-tolyl)ethan-1-ol (**1b**)

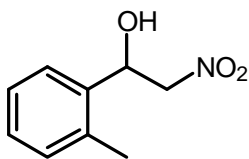

From 2-tolualdehyde (0.18 g, 1.50 mmol) derivative **1b** was obtained (0.14 g, 52 %).  $^1\text{H}$  NMR ( $\text{CDCl}_3$ , 400 MHz) [8]:  $\delta$  = 7.52-7.44 (m, 1H, ArH), 7.30-7.15 (m, 3H, ArH), 5.64 (dd, 1H,  $J$  = 9.6 and 2.7 Hz, CH-OH), 4.51 (dd, 1H,  $J$  = 13.3 and 9.6 Hz, CHH- $\text{NO}_2$ ), 4.40 (dd, 1H,  $J$  = 13.3 and 2.7 Hz, CHH- $\text{NO}_2$ ), 2.36 (s, 3H,  $\text{CH}_3$ );  $\delta$  =  $^{13}\text{C}$  NMR ( $\text{CDCl}_3$ , 100.6 MHz) [8]:  $\delta$  = 136.4, 134.6, 131.0, 128.8, 126.9, 125.7, 80.4, 68.1, 19.0.

HPLC [8]: Chiralcel OD, 90/10 hexane/*i*-PrOH, 0.6 mL/min, 215 nm, (*R*)-**1b**  $t_r$  = 17.8 min, (*S*)-**1b**  $t_r$  = 20.0 min.

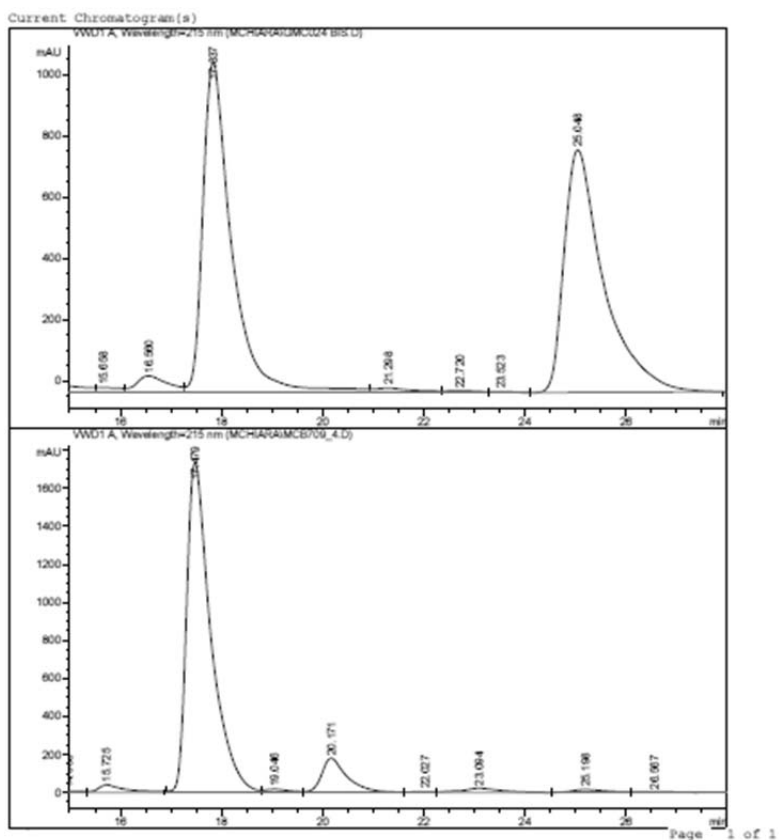

## 2-Nitro-1-(*m*-tolyl)ethan-1-ol (**1c**):

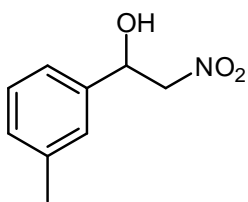

From 3-tolualdehyde (0.18 g, 1.5 mmol) derivative **1b** was obtained (0.15 g, 56 %).  $^1\text{H}$  NMR (400 MHz,  $\text{CDCl}_3$ ) [9]:  $\delta$  = 7.26 (m, 1H, Ar-H), 7.16 (m, 3H, Ar-H), 5.43 (dd,  $J$  = 9.6 and 3.1 Hz, 1H,  $\text{CHOH}$ ), 4.61 (dd,  $J$  = 13.2 and 9.5, 1H,  $\text{CHH-NO}_2$ ), 4.49 (dd,  $J$  = 13.2 and 3.1 Hz,  $\text{CHH-NO}_2$ ); 2.37 (s, 3H,  $\text{CH}_3$ );  $^{13}\text{C}$  NMR (400 MHz,  $\text{CDCl}_3$ ) [9]:  $\delta$  = 138.9, 138.6, 129.6, 129.0, 126.7, 123.1, 81.7, 71.1, 21.5.

HPLC [10]: Chiralcel OD, 90/10 hexane/*i*-PrOH, 0.6 mL/min, 215 nm, (*R*)-**1c**  $t_r$  = 19.3 min, (*S*)-**1c**  $t_r$  = 22.2 min.

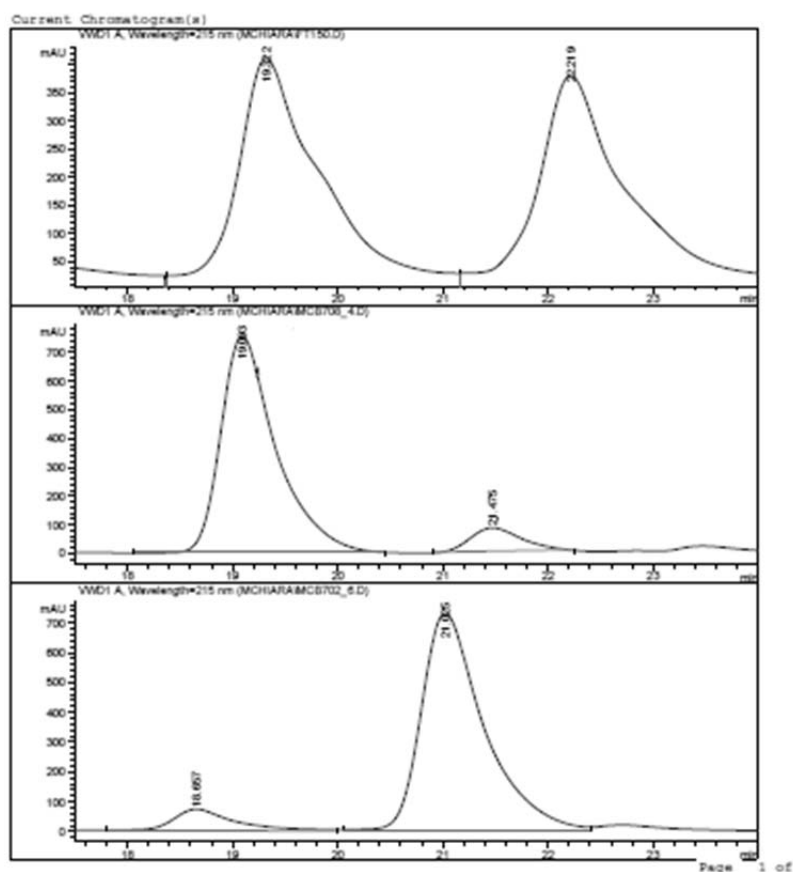



## 2-Nitro-1-(p-tolyl)ethan-1-ol (**1d**)

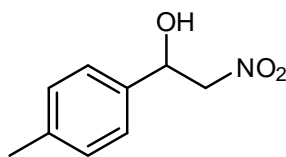

From 4-tolualdehyde (0.18 g, 1.5 mmol) derivative **1d** was obtained (0.18 g, 66 %).  $^1\text{H}$  NMR ( $\text{CDCl}_3$ , 400 MHz) [9]:  $\delta$  = 7.31-7.27 (d, 2H,  $J$  = 8.0 Hz, ArH), 7.23-7.19 (d, 2H,  $J$  = 8.0 Hz, ArH), 5.43 (dd, 1H,  $J$  = 9.5 and 3.0 Hz, CH-OH), 4.61 (dd, 1H,  $J$  = 13.3 and 9.5 Hz, CHH- $\text{NO}_2$ ), 4.49 (dd, 1H,  $J$  = 13.3 and 3.0 Hz, CHH- $\text{NO}_2$ ), 2.36 (s, 3H,  $\text{CH}_3$ );  $^{13}\text{C}$  NMR ( $\text{CDCl}_3$ , 100.6 MHz) [9]:  $\delta$  = 139.3, 135.4, 129.8, 126.0, 81.4, 71.1, 21.3.

HPLC [10]: Chiralcel OD, 90/10 hexane/*i*-PrOH, 0.6 mL/min, 215 nm, (*R*)-**1d**  $t_r$  = 22.3 min, (*S*)-**1d**  $t_r$  = 28.8 min.

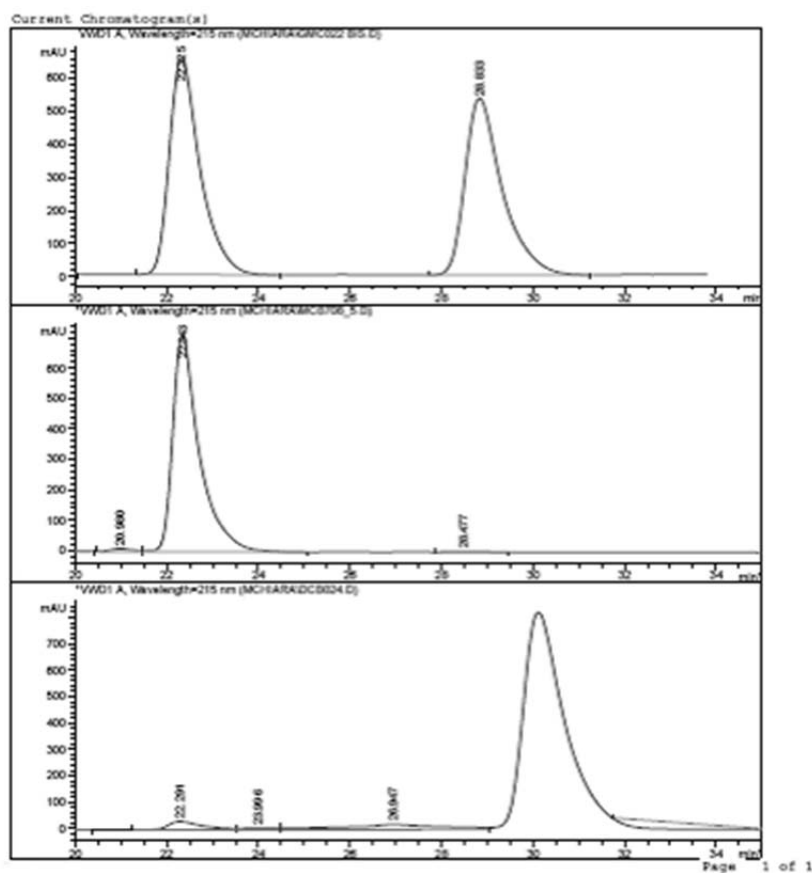

### 1-(4-Methoxyphenyl)-2-nitroethan-1-ol (**1e**)

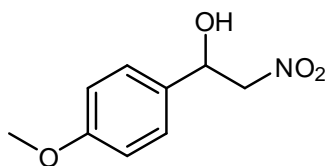

From 4-anisaldehyde (0.20 g, 1.5 mmol) derivative **1e** was obtained (0.19 g, 64%).  $^1\text{H}$  NMR ( $\text{CDCl}_3$ , 400 MHz)[8]:  $\delta$  = 7.33 - 7.31 (m, 2H, ArH), 6.93 - 6.90 (m, 2H, ArH), 5.42 (dd, 1H,  $J$  = 9.6 and 3.1 Hz,  $\text{CH-OH}$ ), 4.61 (dd, 1H,  $J$  = 13.3 and 9.5 Hz,  $\text{CHH-NO}_2$ ), 4.61 (dd, 1H,  $J$  = 13.3 and 9.5 Hz,  $\text{CHH-NO}_2$ ), 4.48 (dd, 1H,  $J$  = 13.3 and 3.1 Hz,  $\text{CHH-NO}_2$ ), 3.81 (s, 3H,  $\text{OCH}_3$ );  $^{13}\text{C}$  NMR ( $\text{CDCl}_3$ , 100.6 MHz) [8]:  $\delta$  = 160.2, 130.4, 127.4, 114.6, 81.4, 70.8, 55.5.

HPLC [8]: Chiralcel OD, 90/10 hexane/*i*-PrOH, 0.6 mL/min, 215 nm, (*R*)-**1e**  $t_r$  = 31.8 min, (*S*)-**1e**  $t_r$  = 40.7 min

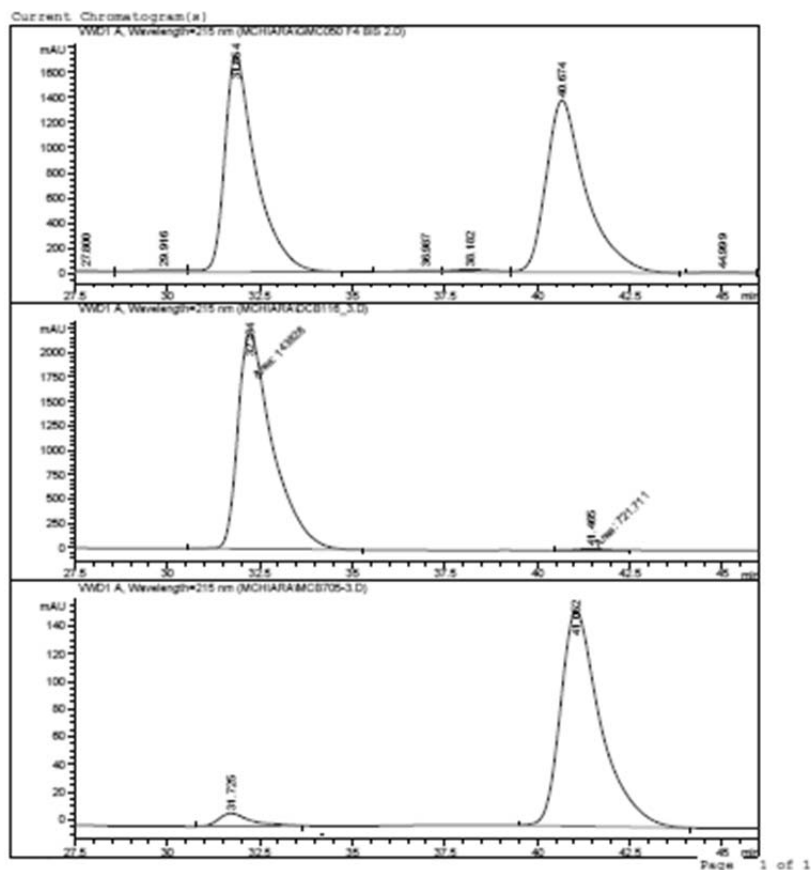

### 1-(2-Fluorophenyl)-2-nitroethan-1-ol (**1f**)

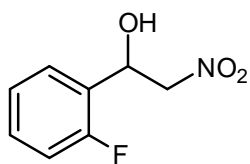

From 2-fluorobenzaldehyde (0.19 g, 1.5 mmol) derivative **1f** was obtained (0.17 g, 61 %).  $^1\text{H}$  NMR ( $\text{CDCl}_3$ , 400 MHz) [11]:  $\delta$  = 7.57 (m, 1H, Ar-H), 7.34 (m, 1H, Ar-H), 7.22 (m, 1H, Ar-H), 7.08 (m, 1H, Ar-H), 5.75 (dd,  $J$  = 8.5 and 3.8 Hz, 1H,  $\text{CHOH}$ ), 4.61 (m, 2H,  $\text{CH}_2\text{NO}_2$ );  $^{13}\text{C}$  NMR (400 MHz,  $\text{CDCl}_3$ ):  $\delta$  = 159.5 (d,  $J$  = 246 Hz), 136.5 (d,  $J$  = 9.2 Hz), 130.4 (d,  $J$  = 8.3 Hz), 127.8 (d,  $J$  = 3.8 Hz), 124.9 (d,  $J$  = 3.6 Hz), 116.6 (d,  $J$  = 20.4 Hz), 115.7 (d,  $J$  = 21.2 Hz), 80.2, 65.4.

HPLC [11]: Chiralart Amylose SA, 97/3 hexane/*i*-PrOH, 0.6 mL/min, 215 nm, (*S*)-**1f**  $t_r$  = 32.7 min, (*R*)-**1f**  $t_r$  = 36.2 min.

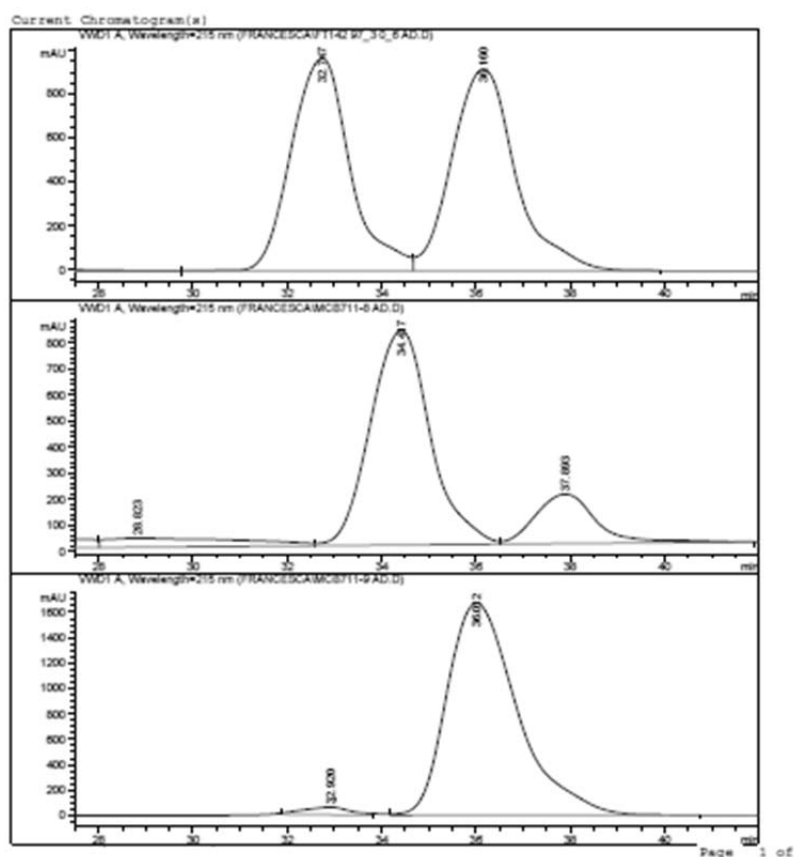

### 1-(3-Fluorophenyl)-2-nitroethan-1-ol (**1g**)

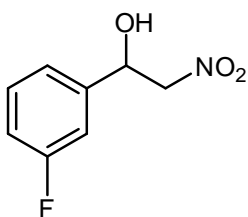

From 3-fluorobenzaldehyde (0.19 g, 1.5 mmol) derivative **1g** was obtained (0.16 g, 57 %).  $^1\text{H}$  NMR ( $\text{CDCl}_3$ , 400 MHz) [12]:  $\delta$  = 7.40 - 7.33 (m, 1H, ArH), 7.20 - 7.12 (m, 2H, ArH), 7.08 - 7.01 (m, 1H, ArH), 5.47 (dd, 1H,  $J$  = 9.2 and 3.3 Hz,  $\text{CH-OH}$ ), 4.59 (dd, 1H,  $J$  = 13.4 and 9.4 Hz,  $\text{CHH-NO}_2$ ), 4.52 (dd, 1H,  $J$  = 13.4 and 3.3 Hz,  $\text{CHH-NO}_2$ );  $^{13}\text{C}$  NMR ( $\text{CDCl}_3$ , 100.6 MHz) [12]:  $\delta$  = 163.2 (d,  $J$  = 247 Hz), 141.5 ( $J$  = 7.2 Hz), 130.7 (d,  $J$  = 8.1 Hz), 121.6 (d,  $J$  = 3.4 Hz), 115.9 (d,  $J$  = 21.2 Hz), 113.4 (d,  $J$  = 22.4 Hz), 81.5, 70.4.

HPLC [12]: Chiralcel OD, 90/10 hexane/*i*-PrOH, 0.6 mL/min, 215 nm, (*R*)-**1g**  $t_r$  = 21.0 min, (*S*)-**1g**  $t_r$  = 24.3 min.

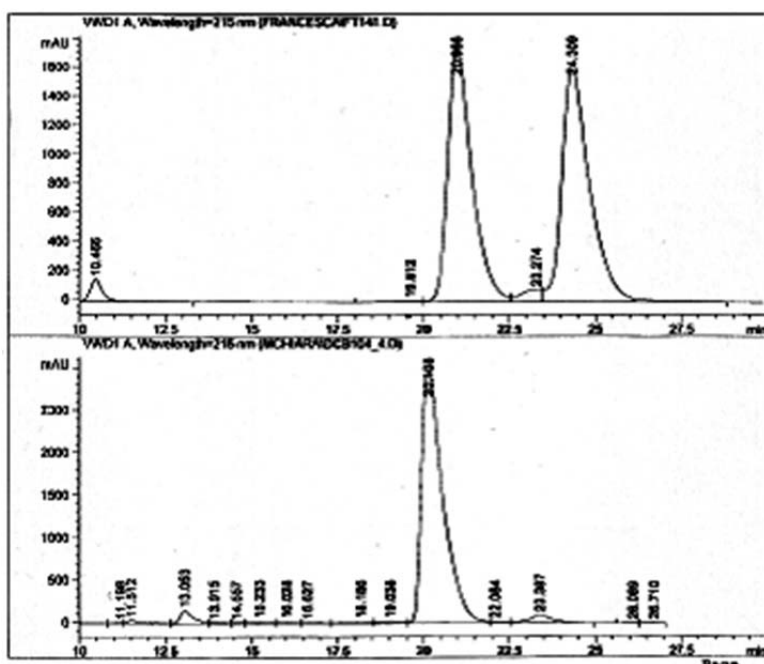

### 1-(4-Fluorophenyl)-2-nitroethan-1-ol (**1h**)

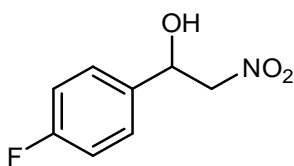

From 4-fluorobenzaldehyde (0.19 g, 1.5 mmol) derivative **1h** was obtained (0.18 g, 65 %).  $^1\text{H}$  NMR ( $\text{CDCl}_3$ , 400 MHz) [7]:  $\delta$  = 7.42-7.37 (m, 2H, ArH), 7.12-7.07 (m, 2H, ArH), 5.46 (dd, 1H,  $J$  = 9.4 and 3.2 Hz, CH-OH), 4.59 (dd, 1H,  $J$  = 13.4 and 9.4 Hz, CHH- $\text{NO}_2$ ), 4.50 (dd, 1H,  $J$  = 13.4 and 3.1 Hz, CHH- $\text{NO}_2$ );  $^{13}\text{C}$  NMR ( $\text{CDCl}_3$ , 100.6 MHz) [7]:  $\delta$  = 163.1 (d,  $J$  = 248 Hz), 134.0 (d,  $J$  = 3.2 Hz), 127.9 (d,  $J$  = 8.2 Hz), 116.2 (d,  $J$  = 22 Hz), 81.3, 70.5.

HPLC [7]: Chiralcel OD, 90/10 hexane/*i*-PrOH, 0.6 mL/min, 215 nm, (*R*)-**1h**  $t_r$  = 18.9 min, (*S*)-**1h**  $t_r$  = 22.5 min.

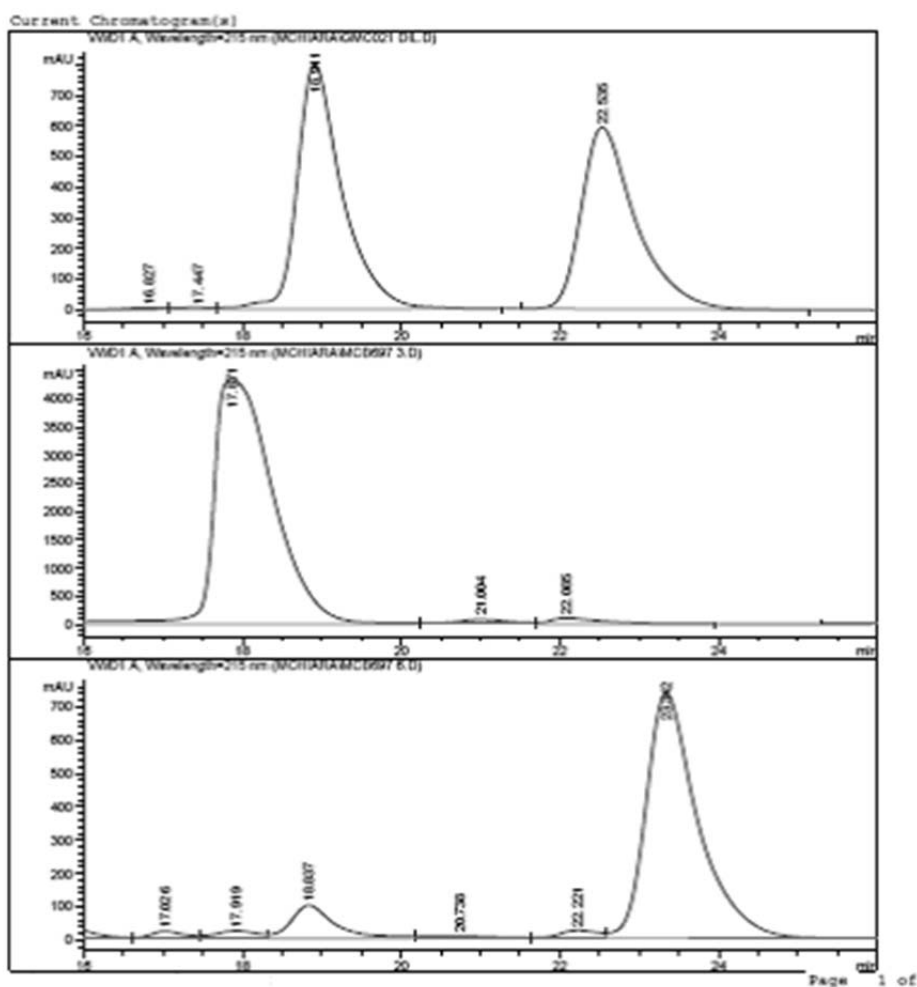

### 1-(4-Bromophenyl)-2-nitroethan-1-ol (**1i**)

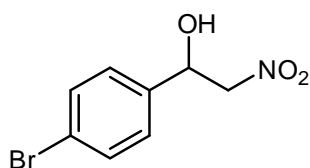

From 4-bromobenzaldehyde (0.28 g, 1.5 mmol) derivative **1i** was obtained (0.19 g, 52%).  $^1\text{H}$  NMR ( $\text{CDCl}_3$ , 400 MHz) [9]:  $\delta$  = 7.56-7.52 (m, 2H, ArH), 7.31-7.28 (m, 2H, ArH), 5.44 (dd, 1H,  $J$  = 9.3 and 3.2 Hz, CH-OH), 4.57 (dd, 1H,  $J$  = 13.5 and 9.2 Hz, CHH- $\text{NO}_2$ ), 4.49 (dd, 1H,  $J$  = 13.5 and 3.2 Hz, CHH- $\text{NO}_2$ );  $^{13}\text{C}$  NMR ( $\text{CDCl}_3$ , 100.6 MHz) [9]:  $\delta$  = 137.2, 132.3, 127.8, 123.1, 81.1, 70.5.

HPLC [9]: Chiralcel OD, 95/5 hexane/*i*-PrOH, 0.6 mL/min, 215 nm, (*R*)-**1i**  $t_r$  = 49.5 min, (*S*)-**1i**  $t_r$  = 65.9 min.

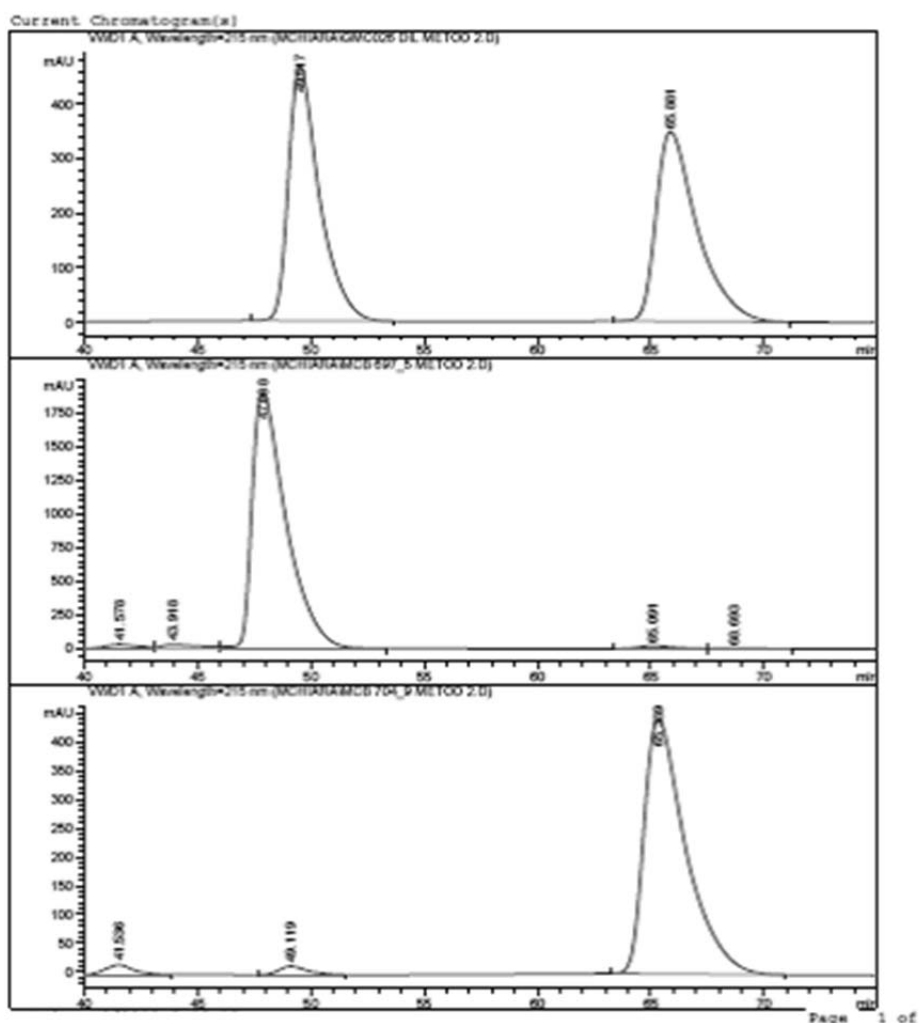

### 1-(4-Chlorophenyl)-2-nitroethan-1-ol (**1j**)

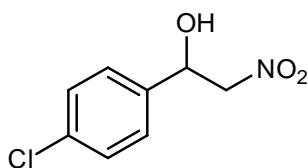

From 4-chlorobenzaldehyde (0.21 g, 1.5 mmol) derivative **1j** was obtained (0.19 g, 63%).  $^1\text{H}$  NMR ( $\text{CDCl}_3$ , 400 MHz) [7]:  $\delta$  = 7.41-7.33 (m, 4H, ArH), 5.45 (dd, 1H,  $J$  = 9.4 and 3.1 Hz,  $\text{CH-OH}$ ), 4.58 (dd, 1H,  $J$  = 13.4 and 9.3 Hz,  $\text{CHH-NO}_2$ ), 4.50 (dd, 1H,  $J$  = 13.4 and 3.2 Hz,  $\text{CHH-NO}_2$ );  $^{13}\text{C}$  NMR ( $\text{CDCl}_3$ , 100.6 MHz) [7]:  $\delta$  = 136.8, 134.8, 129.2, 127.4, 81.1, 70.4.

HPLC [7]: Chiralcel OD, 90/10 hexane/*i*-PrOH, 0.6 mL/min, 215 nm, (*R*)-**1j**  $t_r$  = 20.6 min, (*S*)-**1j**  $t_r$  = 25.6 min.

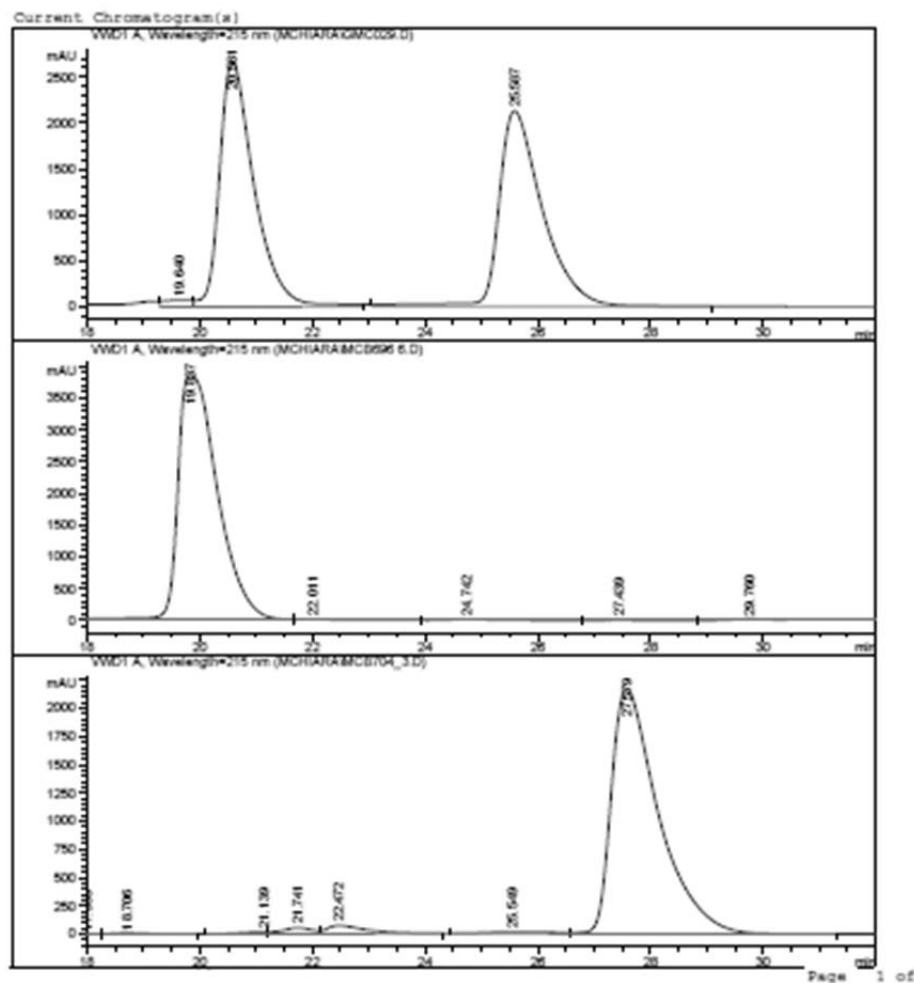

### 1-(Naphthalen-2-yl)-2-nitroethan-1-ol (**1k**)

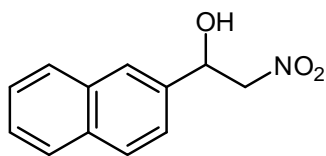

From 2- naphthaldehyde (0.23 g, 1.5 mmol) derivative **1k** was obtained (0.20 g, 62 %).  $^1\text{H}$  NMR ( $\text{CDCl}_3$ , 400 MHz) [13]:  $\delta$  = 7.90 - 7.75 (m, 4H, ArH), 7.53 - 7.47 (m, 2H, ArH), 7.44 (dd, 1H,  $J$  = 8.4 and 1.8 Hz, ArH), 5.59 (dd, 1H,  $J$  = 9.5 and 3.2 Hz,  $\text{CH-OH}$ ), 4.67 (dd, 1H,  $J$  = 13.2 and 9.5 Hz,  $\text{CHH-NO}_2$ ), 4.56 (dd, 1H,  $J$  = 13.2 and 3.2 Hz,  $\text{CHH-NO}_2$ );  $^{13}\text{C}$  NMR ( $\text{CDCl}_3$ , 100.6 MHz) [13]:  $\delta$  = 136.0, 133.4, 133.2, 128.8, 128.1, 127.8, 126.61, 126.57, 125.3, 123.4, 81.3, 71.1.

HPLC [14]: Chiralcel OD, 80/20 hexane/*i*-PrOH, 0.8 mL/min, 215 nm, (*R*)-**1k**  $t_r$  = 25.2 min, (*S*)-**1k**  $t_r$  = 36.8 min.

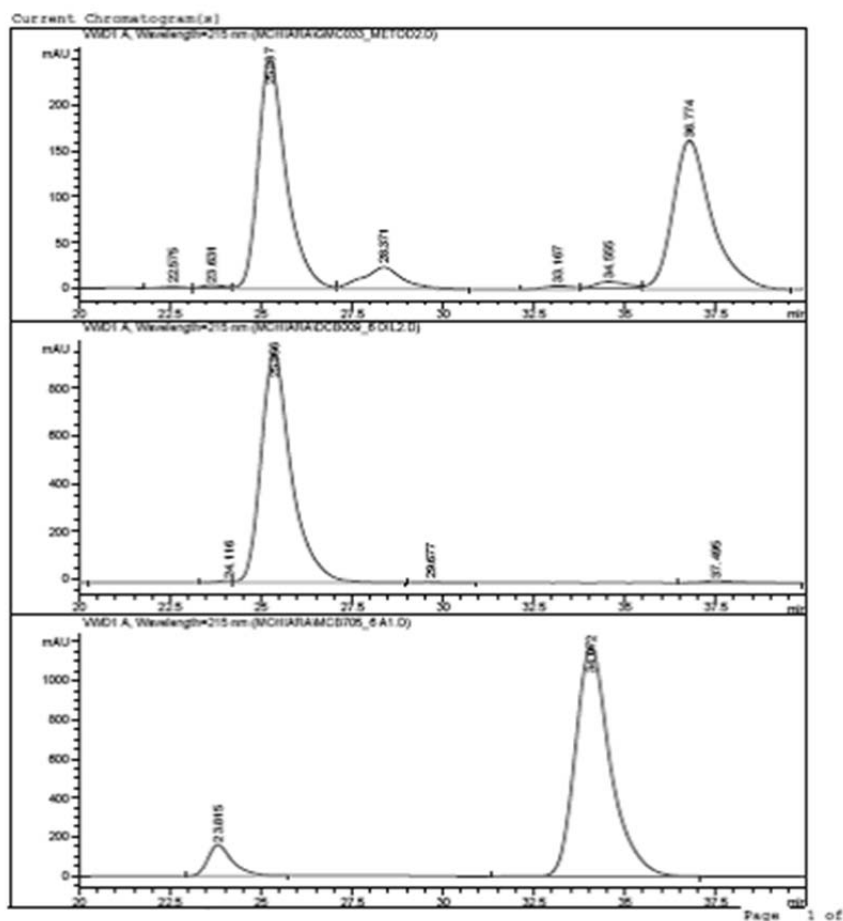



### 1-(Furan-2-yl)-2-nitroethan-1-ol (**11**)

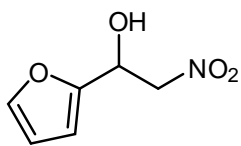

From 2- furanaldehyde (0.14 g, 1.5 mmol) derivative **11** was obtained (0.14 g, 59 %).  $^1\text{H}$  NMR ( $\text{CDCl}_3$ , 400 MHz) [9]:  $\delta$  = 7.43-7.41(m, 1H, furan H), 6.42-6.37 (m, 2H, furan H), 4.79 (dd, 1H,  $J$  = 13.5 and 8.8 Hz,  $\text{CHH-NO}_2$ ), 4.68 (dd, 1H,  $J$  = 13.5 and 3.5 Hz,  $\text{CHH-NO}_2$ );  $^{13}\text{C}$  NMR ( $\text{CDCl}_3$ , 100.6 MHz) [9]:  $\delta$  = 150.9, 143.3, 110.8, 108.3, 78.6, 65.0.

HPLC [15]: Chiralart Amylose SA, 90/10 hexane/*i*-PrOH, 0.5 mL/min, 215 nm, (*S*)-**11**  $t_r$  = 20.5 min, (*R*)-**11**  $t_r$  = 22.1 min.

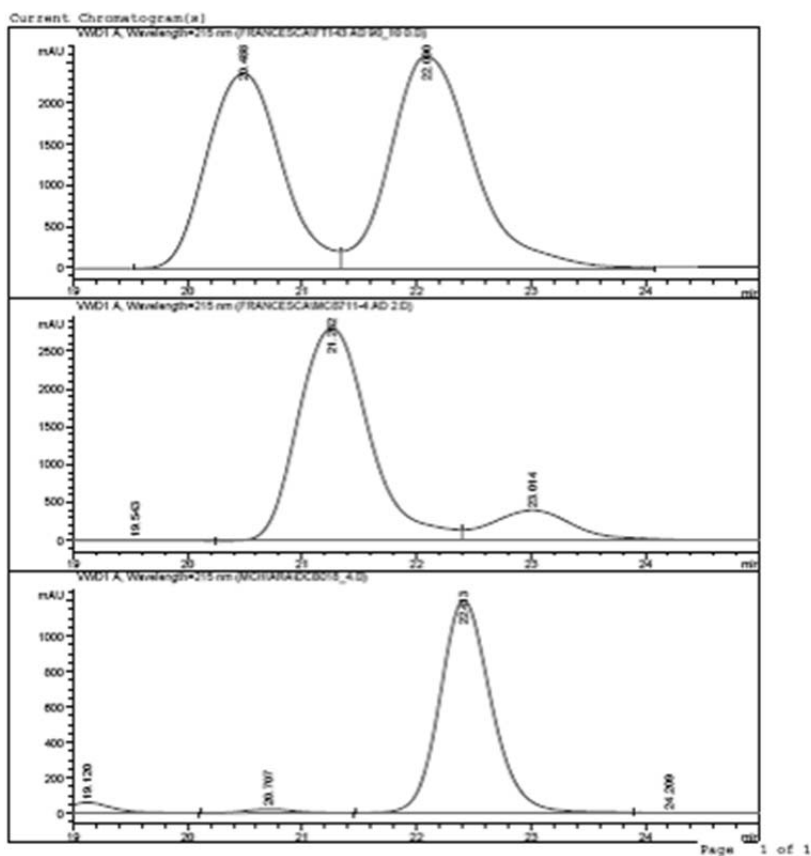

## 2-Nitro-1-(thiophen-2-yl)ethan-1-ol (**1m**)

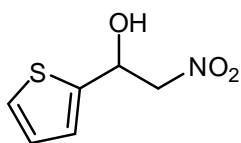

From thiophen-2-aldehyde (0.17 g, 1.50 mmol) derivative **1m** was obtained (0.15 g, 58%).<sup>1</sup> H NMR (CDCl<sub>3</sub>, 400 MHz) [10]:  $\delta$  = 7.34 (dd, 1H,  $J$  = 5.1 and 1.3 Hz, thiophen H), 7.08-7.06 (m, 1H, thiophen H), 7.02 (dd, 1H,  $J$  = 5.1 and 3.5 Hz, thiophen H), 5.73 (dd, 1H,  $J$  = 9.3 and 3.3 Hz, CH-OH), 4.72 (dd, 1H,  $J$  = 13.5 and 9.2 Hz, CHH-NO<sub>2</sub>), 4.62 (dd, 1H,  $J$  = 13.5 and 3.3 Hz, CHH-NO<sub>2</sub>);  
<sup>13</sup> C NMR (CDCl<sub>3</sub>, 100.6 MHz) [10]:  $\delta$  = 141.3, 127.0, 126.4, 124.9, 80.6, 67.1.

HPLC [16]: Chiralcel OD, 90/10 hexane/*i*-PrOH, 0.6 mL/min, 215 nm, (*S*)-**1m**  $t_r$  = 22.8 min, (*R*)-**1m**  $t_r$  = 24.7 min.

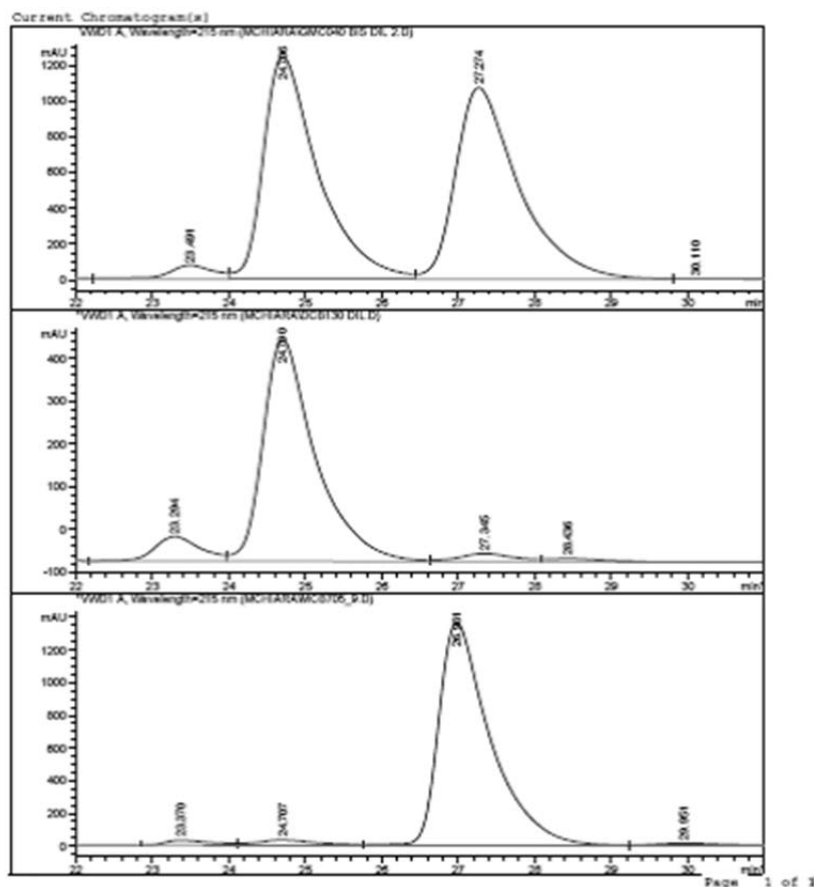

CC(O)CC([N+](=O)[O-])

HPLC [12]: Chiralcel OD, 97/3 hexane/*i*-PrOH, 0.6 mL/min, 215 nm, (*R*)-**1n** t<sub>r</sub> = 30.2 min, (*S*)-**1n** t<sub>r</sub> = 32.8 min.

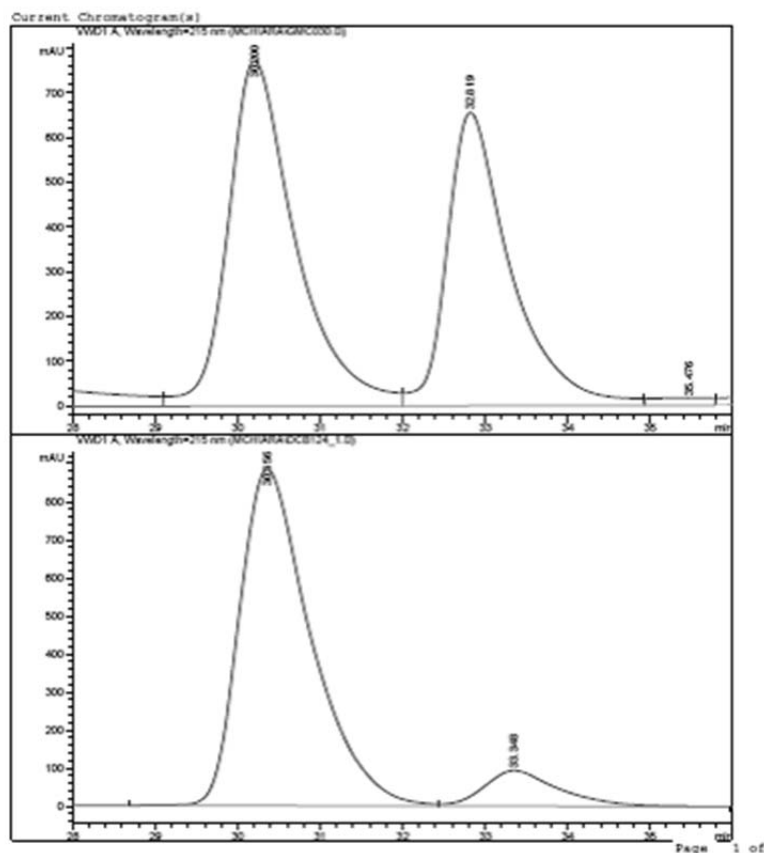

CCCC(O)C[N+](=O)[O-]

HPLC [14]: Chiralcel OD, 97/3 hexane/*i*-PrOH, 0.6 mL/min, 215 nm, (*R*)-**10** t<sub>r</sub> = 23.8 min, (*S*)-**10** t<sub>r</sub> = 24.9 min.

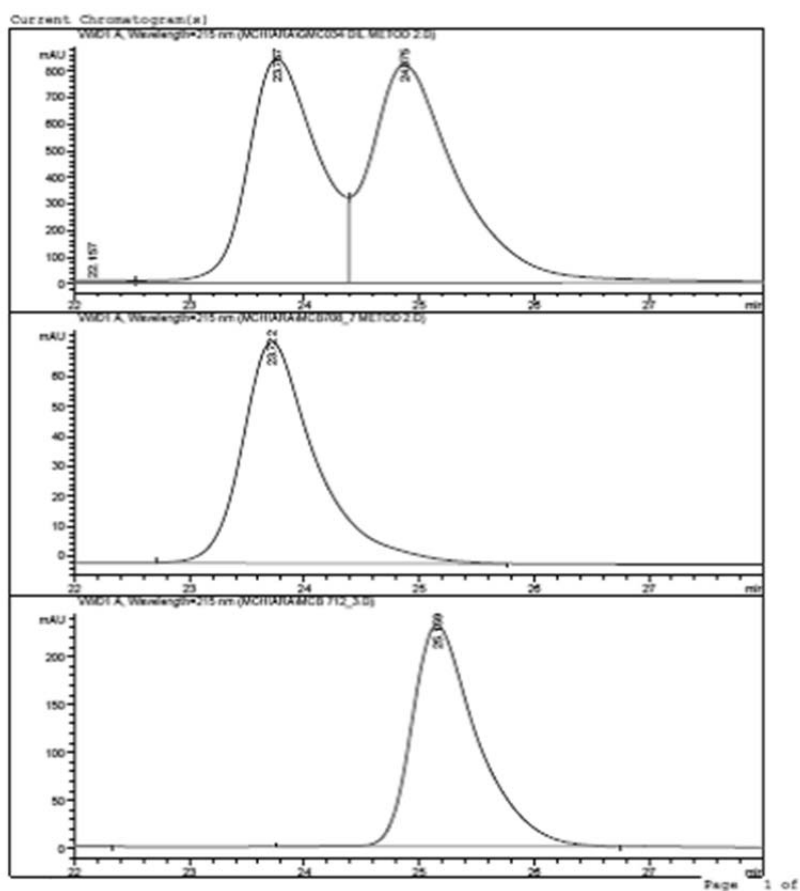

**Table S1.** ADH-mediated reduction of nitroketone **3a** to nitroalcohol **1a** (preliminary screening)<sup>1</sup>

| ADH | conversion (%) <sup>2</sup> | ee of <b>1a</b> (%) <sup>3</sup> |
|-----|-----------------------------|----------------------------------|
| 10  | 27                          | 75 ( <i>R</i> )                  |
| 20  | -                           |                                  |
| 30  | 15                          | 96 ( <i>R</i> )                  |
| 40  | -                           |                                  |
| 130 | <10                         |                                  |
| 140 | 44                          | 92 ( <i>R</i> )                  |
| 190 | <10                         | n.d.                             |
| 200 | 15                          | 12 ( <i>R</i> )                  |
| 210 | -                           |                                  |
| 250 | -                           |                                  |
| 260 | -                           |                                  |
| 270 | 94                          | 92 ( <i>S</i> )                  |
| 380 | -                           |                                  |
| 420 | -                           |                                  |
| 430 | -                           |                                  |
| 440 | 96                          | 99 ( <i>R</i> )                  |
| 441 | 82                          | 90 ( <i>S</i> )                  |
| 442 | 52                          | 40 ( <i>R</i> )                  |

<sup>1</sup>5 mM substrate, 16 mM glucose, ADH (3 mg), GDH (1.5 mg), NAD(P)<sup>+</sup> (1 μmol), 1% DMSO, acetate buffer pH 5.0, 25°C, 4-5 h; <sup>2</sup>conversion calculated by <sup>1</sup>H NMR spectroscopy as molar percentage of the nitroalcohol **1a** in the final reaction mixture after 4-5 h, taking into account the molar amount of the unreacted nitroketone **3a**, and of the carboxylic acid obtained upon nitroketone hydrolysis; <sup>3</sup>enantiomeric excess calculated on the basis of HPLC analysis on a chiral stationary phase.

**Table S2.** ADH-mediated reduction of nitroketones **3a-o** to nitroalcohols **1a-o** (preliminary screening)<sup>1</sup>

| Substrate                                             | ADH | conversion (%) <sup>2</sup> | ee of nitroalcohol <b>1</b> (%) <sup>3</sup> |
|-------------------------------------------------------|-----|-----------------------------|----------------------------------------------|
| <b>C<sub>6</sub>H<sub>5</sub> (3a)</b>                | 270 | 94                          | 92 ( <i>S</i> )                              |
|                                                       | 440 | 96                          | 99 ( <i>R</i> )                              |
|                                                       | 441 | 82                          | 90 ( <i>S</i> )                              |
| <i>o</i> -Me- <b>C<sub>6</sub>H<sub>4</sub> (3b)</b>  | 270 | <5                          |                                              |
|                                                       | 440 | 99                          | 99 ( <i>R</i> )                              |
|                                                       | 441 | n.r.                        |                                              |
| <i>m</i> -Me- <b>C<sub>6</sub>H<sub>4</sub> (3c)</b>  | 270 | 35                          | 82 ( <i>S</i> )                              |
|                                                       | 440 | 99                          | 84 ( <i>R</i> )                              |
|                                                       | 441 | 80                          | 93 ( <i>S</i> )                              |
| <i>p</i> -Me- <b>C<sub>6</sub>H<sub>4</sub> (3d)</b>  | 270 | 71                          | 94 ( <i>S</i> )                              |
|                                                       | 440 | 99                          | 99 ( <i>R</i> )                              |
|                                                       | 441 | 59                          | 79 ( <i>S</i> )                              |
| <i>p</i> -OMe- <b>C<sub>6</sub>H<sub>4</sub> (3e)</b> | 270 | 18                          | 91 ( <i>S</i> )                              |
|                                                       | 440 | 93                          | 99 ( <i>R</i> )                              |
|                                                       | 441 | n.r.                        |                                              |
| <i>o</i> -F- <b>C<sub>6</sub>H<sub>4</sub> (3f)</b>   | 270 | 69                          | 62 ( <i>S</i> )                              |
|                                                       | 440 | 100                         | 94 ( <i>R</i> )                              |
|                                                       | 441 | 17                          | 43 ( <i>R</i> )                              |
| <i>m</i> -F- <b>C<sub>6</sub>H<sub>4</sub> (3g)</b>   | 270 | 72                          | rac                                          |
|                                                       | 440 | 99                          | 93 ( <i>R</i> )                              |
|                                                       | 441 | n.r.                        | -                                            |
| <i>p</i> -F- <b>C<sub>6</sub>H<sub>4</sub> (3h)</b>   | 270 | 30                          | 66 ( <i>S</i> )                              |
|                                                       | 440 | 83                          | 96 ( <i>R</i> )                              |
|                                                       | 441 | n.r.                        |                                              |
| <i>p</i> -Br- <b>C<sub>6</sub>H<sub>4</sub> (3i)</b>  | 270 | 69                          | 95 ( <i>S</i> )                              |
|                                                       | 440 | 92                          | 98 ( <i>R</i> )                              |
|                                                       | 441 | n.r.                        |                                              |
| <i>p</i> -Cl- <b>C<sub>6</sub>H<sub>4</sub> (3j)</b>  | 270 | 67                          | 97 ( <i>S</i> )                              |
|                                                       | 440 | 97                          | 98 ( <i>R</i> )                              |
|                                                       | 441 | 94                          | 92 ( <i>S</i> )                              |
| <b>2-Naphthyl (3k)</b>                                | 270 | 23                          | 83 ( <i>S</i> )                              |
|                                                       | 440 | 99                          | 98 ( <i>R</i> )                              |
|                                                       | 441 | 62                          | 62 ( <i>S</i> )                              |
| <b>2-Furyl (3l)</b>                                   | 270 | 73                          | 84 ( <i>R</i> )                              |
|                                                       | 440 | 100                         | 71 ( <i>S</i> )                              |
|                                                       | 441 | 65                          | 96 ( <i>R</i> )                              |
| <b>2-Thienyl (3m)</b>                                 | 270 | 100                         | 93 ( <i>R</i> )                              |
|                                                       | 440 | 100                         | 92 ( <i>S</i> )                              |
|                                                       | 441 | 79                          | 78 ( <i>R</i> )                              |
| <b>Ethyl (3n)</b>                                     | 270 | 100                         | 80 ( <i>R</i> )                              |
|                                                       | 440 | 97                          | rac                                          |
|                                                       | 441 | 73                          | rac                                          |
| <b>Butyl (3o)</b>                                     | 270 | 100                         | 99 ( <i>S</i> )                              |
|                                                       | 440 | 100                         | 99 ( <i>R</i> )                              |
|                                                       | 441 | n.r.                        | -                                            |

<sup>1</sup>5 mM substrate, 16 mM glucose, ADH (3 mg), GDH 1.5 mg), NAD(P)<sup>+</sup> (1 μmol), 1% DMSO, acetate buffer pH 5.0, 25°C, 4-5 h; <sup>2</sup>calculated by <sup>1</sup>H NMR spectroscopy as molar percentage of nitroalcohol **1** in the final reaction mixture after 4-5 h, taking into account the molar amount of the unreacted nitroketone **3**, and of the carboxylic acid obtained upon nitroketone hydrolysis; <sup>3</sup>enantiomeric excess calculated on the basis of HPLC analysis on a chiral stationary phase.

## References

- 1 Bechtold, M.; Brenna, E.; Femmer, C.; Gatti, F.G.; Panke, S.; Parmeggiani, F.; Sacchetti, A. *Org. Process Res. Dev.* **2012**, *16*, 269–276.
- 2 Lindsay, V. N. G.; Cyril, N.; Charette, A. B. *J. Am. Chem. Soc.* **2011**, *133*, 8972–8981.
- 3 Brenna, E.; Crotti, M.; Gatti, F. G.; Monti, D.; Parmeggiani, F.; Santangelo, S. *ChemCatChem*, **2017**, *9*, 2480–2487.
- 4 Katritzky, A. R.; Abdel-Fattah, A. A. A.; Gromova, A. V.; Witek, R.; Steel, P. J. *J. Org. Chem.* **2005**, *70*, 9211 – 9214.
- 5 Lian, Z.; Friis, S. D.; Skrydstrup, T. *Chem. Commun.* **2015**, *51*, 3600 – 3603.
- 6 Takamoto, M.; Kurouchi, H.; Otani, Y.; Ohwada, T. *Synthesis* **2009**, 4129 – 4136.
- 7 Evans, D. A., Seidel, D.; Rueping, M.; Wai Lam, H.; Shaw, J. T.; Downey, C. W. *J. Am. Chem. Soc.* **2003**, *125*, 12692 – 12693.
- 8 Kottala Vijaya, P.; Murugesan, S.; Siva, A. *Org. Biomol. Chem.* **2016**, *14*, 10101 – 10109.
- 9 Xu, D.; Sun, Q.; Quan, Z.; Sun, W.; Wang, X. *Tetrahedron: Asymmetry* **2017**, *28*, 954 – 963.
- 10 Boobalan, R.; Lee, G. H.; Chen, C. *Adv. Synth. Catal.*, **2012**, *354*, 2511–2520.
- 11 Khong, D. T.; Judeh, Z. M. A. *Synthesis* **2016**; *48*, 2271–2279.
- 12 Lu, G.; Zheng, F.; Wang, L.; Guo, Y.; Li, X.; Cao, X.; Wang, C.; Chi, H.; Dong, Y.; Zhang, Z. *Tetrahedron: Asymmetry* **2016**, *27*, 732–739.
- 13 Park, J.; Lang, K.; Abboud, K. A.; Hong, S. *J. Am. Chem. Soc.*, **2008**, *130*, 16484 – 16485.
- 14 Chunhong, Z.; Liu, F.; Gou, S. *Tetrahedron: Asymmetry* **2014**, *25*, 278–283.
- 15 Scharnagel, D.; Prause, F.; Kaldun, J.; Haase, R. G.; Breuning, M. *Chem. Commun.* **2014**, *50*, 6623–6625.
- 16 Ao, C.; Men, J.; Wang, Y.; Shao, T.; Huang, Y.; Huo, J.; Gao, G. *Tetrahedron: Asymmetry* **2016**, *27*, 589–595.
